# Supplementary material
Source: ML conference proceedings conference paper supplement (https://aclanthology.org/D18-1271)
Supplement: Attachment [file D18-1271.Attachment.zip]

Archive with 4 entries (3 files):
- emnlp2018supplementary/notes.pdf
- emnlp2018supplementary/stream_alignment_codes.zip
- emnlp2018supplementary/stream_alignment_data.tar.gz
- emnlp2018supplementary/
